# Supplementary material for: Gadolinium-based contrast agent accelerates the migration of astrocyte via integrin αvβ3 signaling pathway
Source: PubMed Central journal article supplement (PMC8990080; doi:10.1038/s41598-022-09882-7), 2022-04-07

### A. Cell Invasion Assays in C6 cells

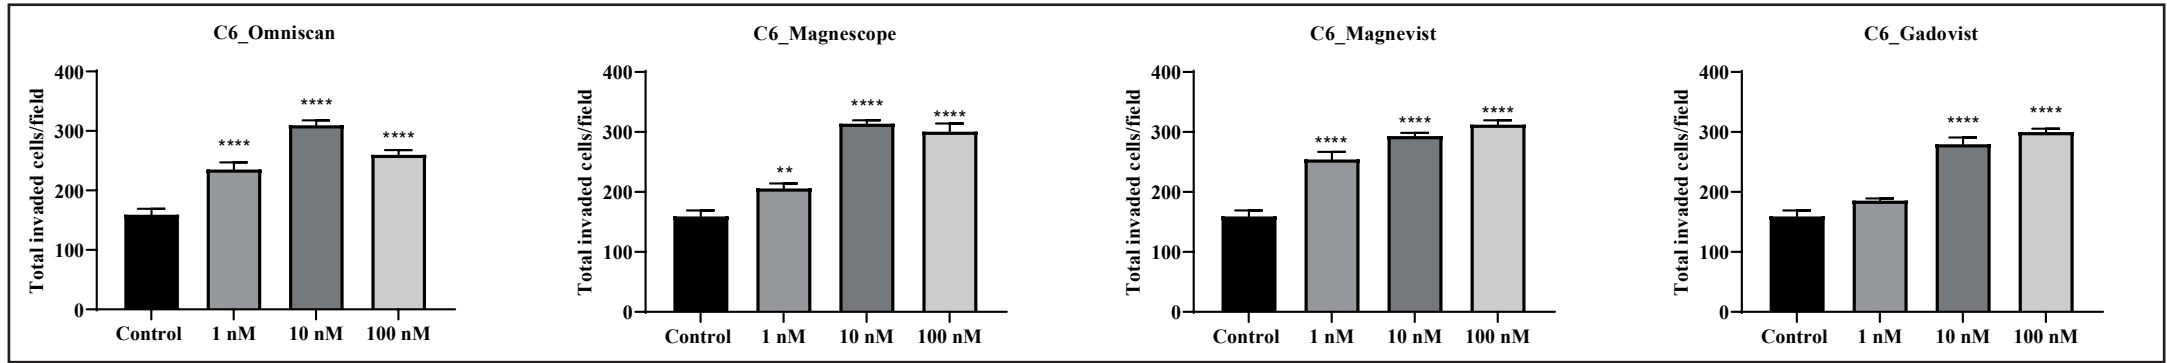

### B. Cell Invasion Assays in U87MG cells

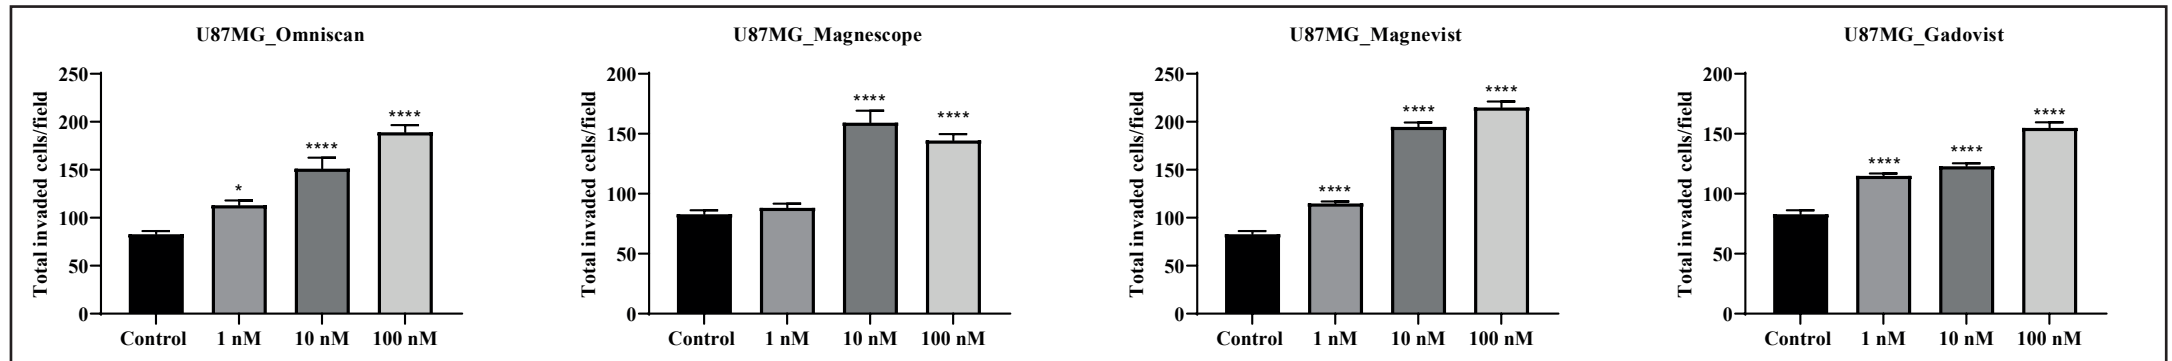

Supplement: 41598_2022_9882_MOESM1_ESM.pdf [file 41598_2022_9882_MOESM1_ESM.pdf]
