# Supplementary material for: Gadolinium-based contrast agent accelerates the migration of astrocyte via integrin αvβ3 signaling pathway
Source: PubMed Central journal article supplement (PMC8990080; doi:10.1038/s41598-022-09882-7), 2022-04-07

Supplementary Figure S2.

A. Cell Invasion Assays

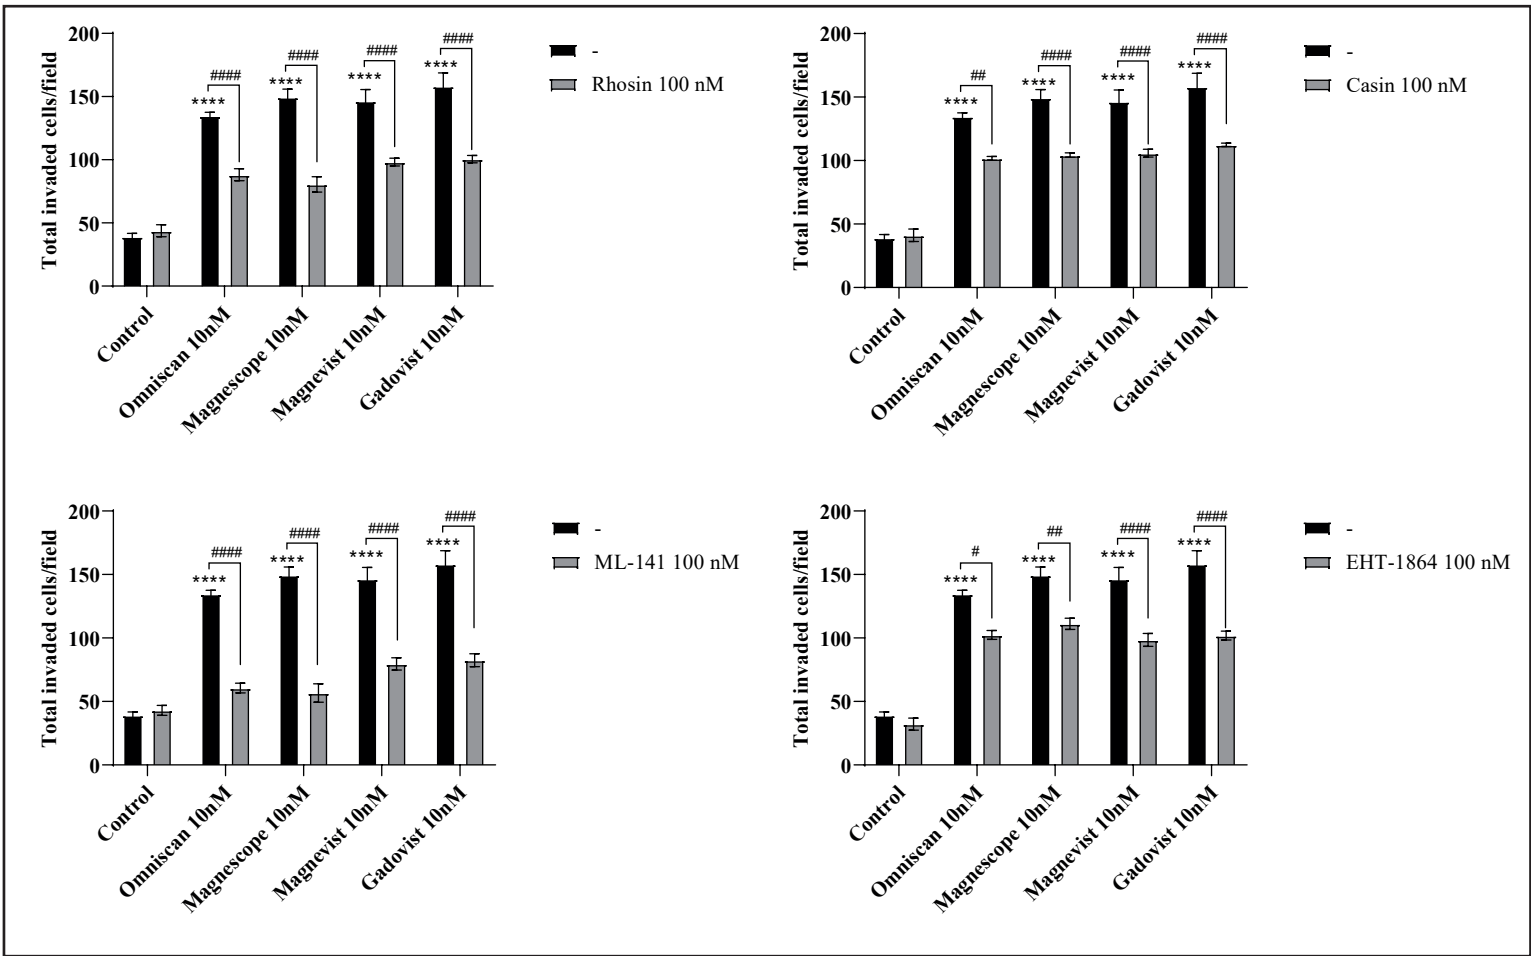

B. Cell Adhesion Assays

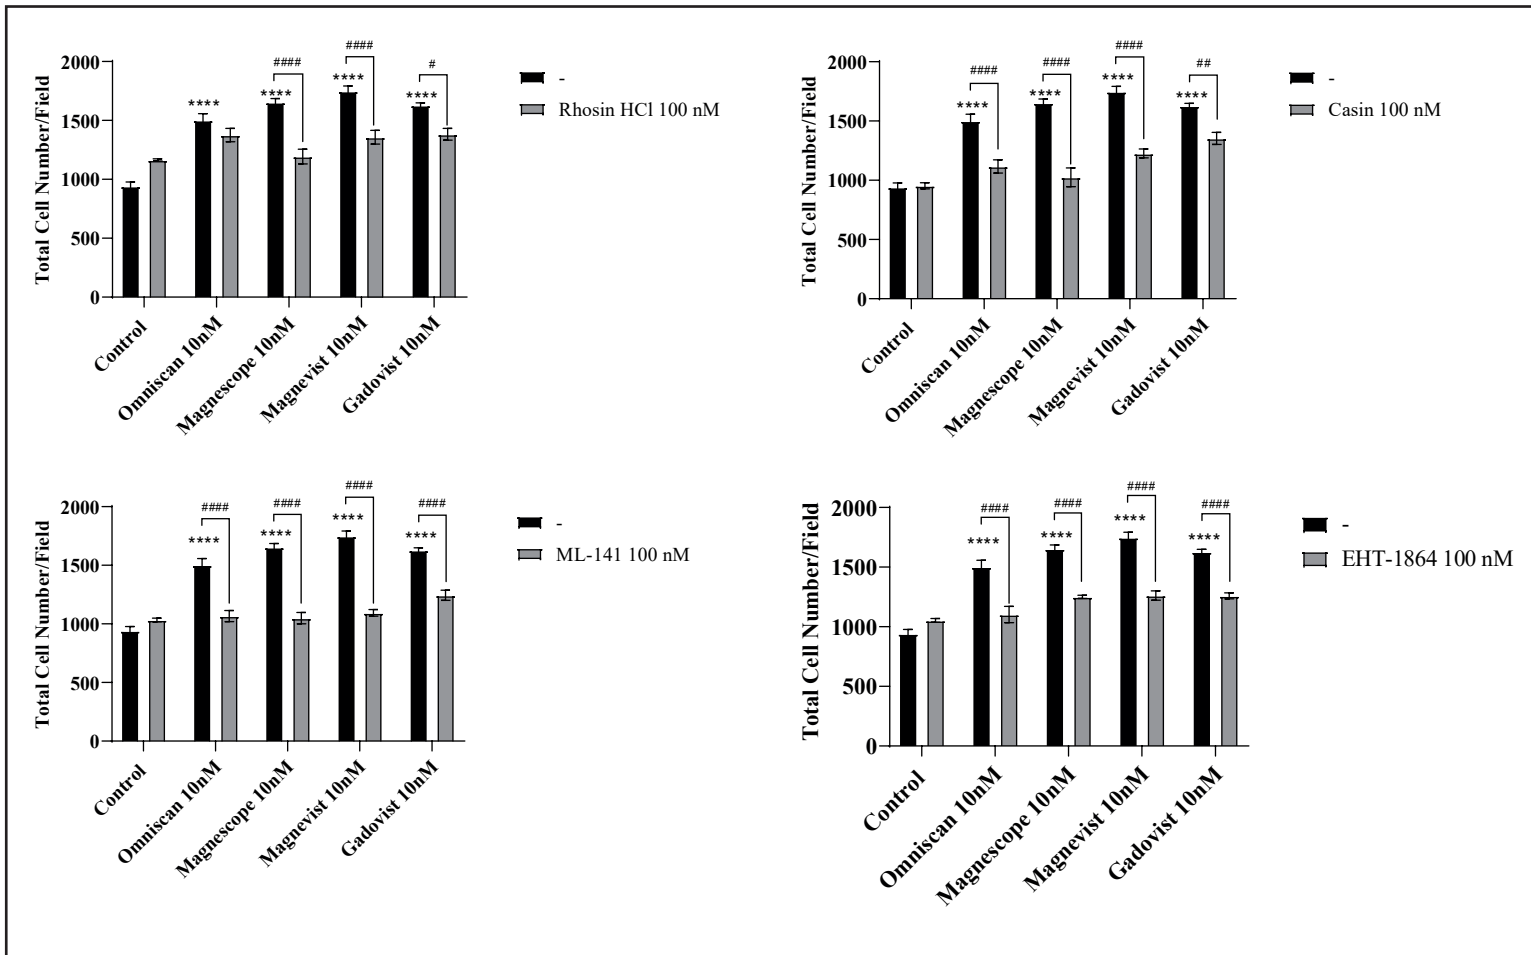

Supplement: 41598_2022_9882_MOESM2_ESM.pdf [file 41598_2022_9882_MOESM2_ESM.pdf]
