# Supplementary material for: Gadolinium-based contrast agent accelerates the migration of astrocyte via integrin αvβ3 signaling pathway
Source: PubMed Central journal article supplement (PMC8990080; doi:10.1038/s41598-022-09882-7), 2022-04-07
Supplement: 41598_2022_9882_MOESM5_ESM.pdf [file 41598_2022_9882_MOESM5_ESM.pdf]

# Supplementary Figure S5.

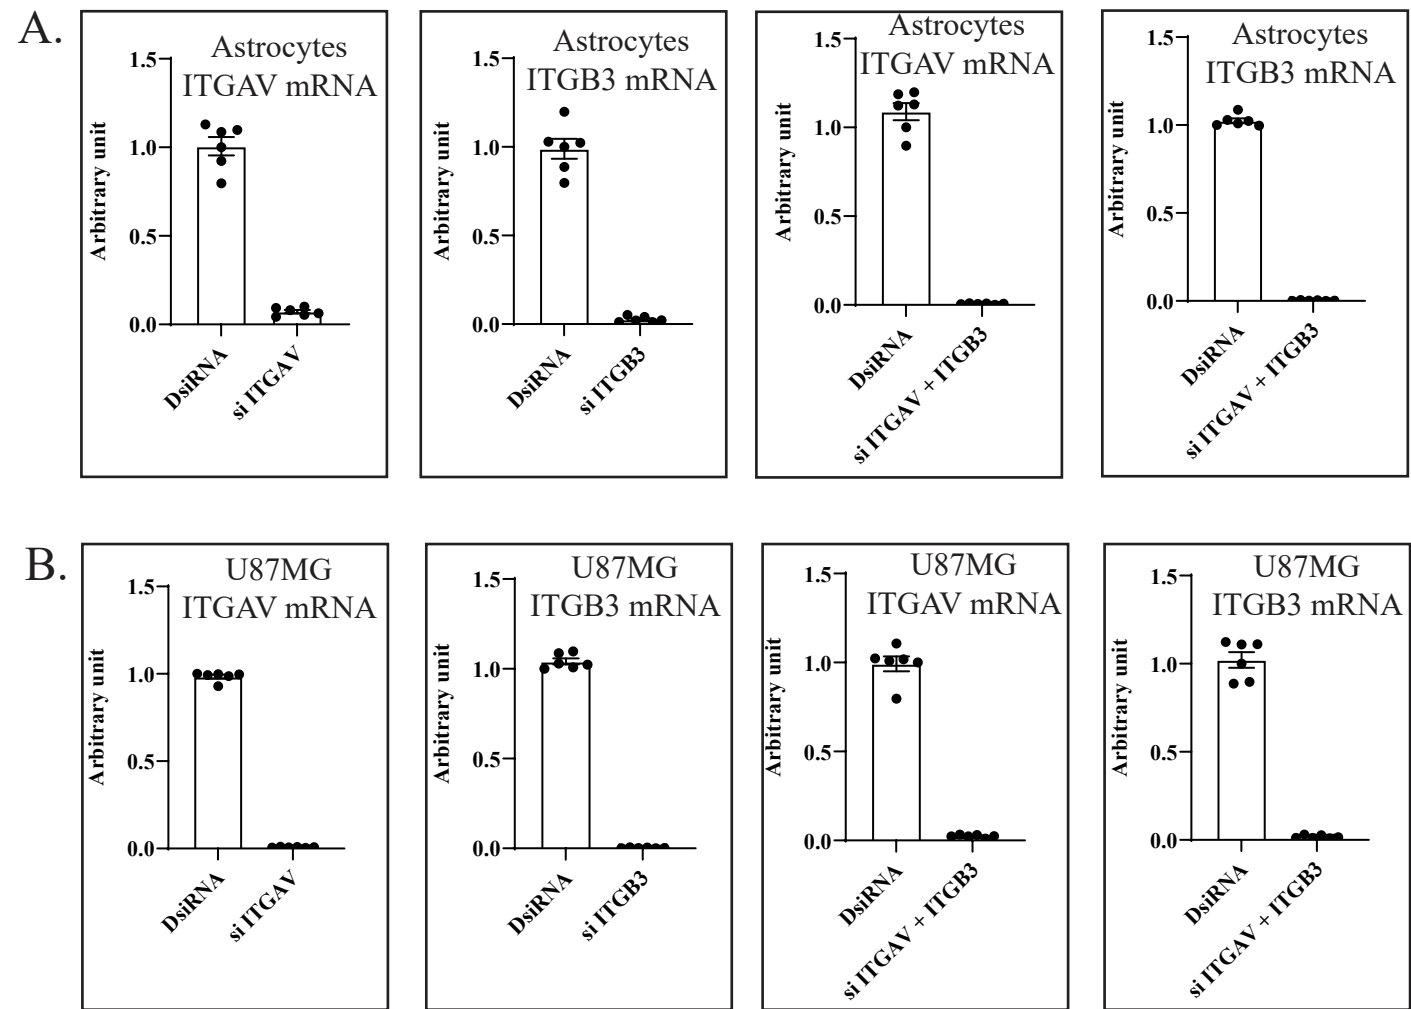

Table 1. siRNA target sequences.

| Gene            | Sense                    | Antisense                  |
|-----------------|--------------------------|----------------------------|
| DsiRNA Controls | CGUUAUCGCGUAUAAUACGCGUAT | AUACGCGUAUUUACGCGAUUAACGAC |
| ITGAV (Mouse)   | ACAGUUGACUUCAUAAGC       | UUCAGUAGCUUAUGAAGU         |
| ITGB3 (Mouse)   | CUAGGCAAGAACAUUACC       | AUCAGUUGGUA AUGUUCU        |
| ITGAV (Human)   | GACUGAGCUAAUCUUGAG       | AUAUAUUCUCAAGAUUAG         |
| ITGB3 (Human)   | GGUCUCUUUCAGUAUCA        | UAGAAUGUUGAUACUGAA         |

Table 2. Primer sequences.

| Gene                 | Sense                | Antisense             |
|----------------------|----------------------|-----------------------|
| <i>ITGAV</i> (Mouse) | TGTGAAGGCGCAGAATCAAG | AATGCACAGGACAGTCTTGC  |
| <i>ITGB3</i> (Mouse) | GGCAAAAACGCCGTGAATTG | TTCCACCACATAGAGGACTGC |
| <i>GAPDH</i> (Mouse) | TGCGACTTCAACAGCAACTC | ATGTAGGCCATGAGGTCCAC  |
| <i>ITGAV</i> (Human) | TTCTTCCGATTCCAACTGG  | TGCCTTGCTGAATGA ACTTG |
| <i>ITGB3</i> (Human) | TGGCAGCTGTGTCTGTATCC | CCCCGGTCAA ACTTCTTACA |
| <i>GAPDH</i> (Human) | TGAGTCCTTCCACGATACCA | GATCATCAGCAATGCCTCCT  |
